# Supplementary figures and images for: Integrated Transcriptome and Metabolome Analysis Reveals the Molecular Mechanism of Rust Resistance in Resistant (Youkang) and Susceptive (Tengjiao) Zanthoxylum armatum Cultivars
Source: MDPI journal article supplement (doi:10.3390/ijms241914761), 2023-09-29

Number of tran/meta

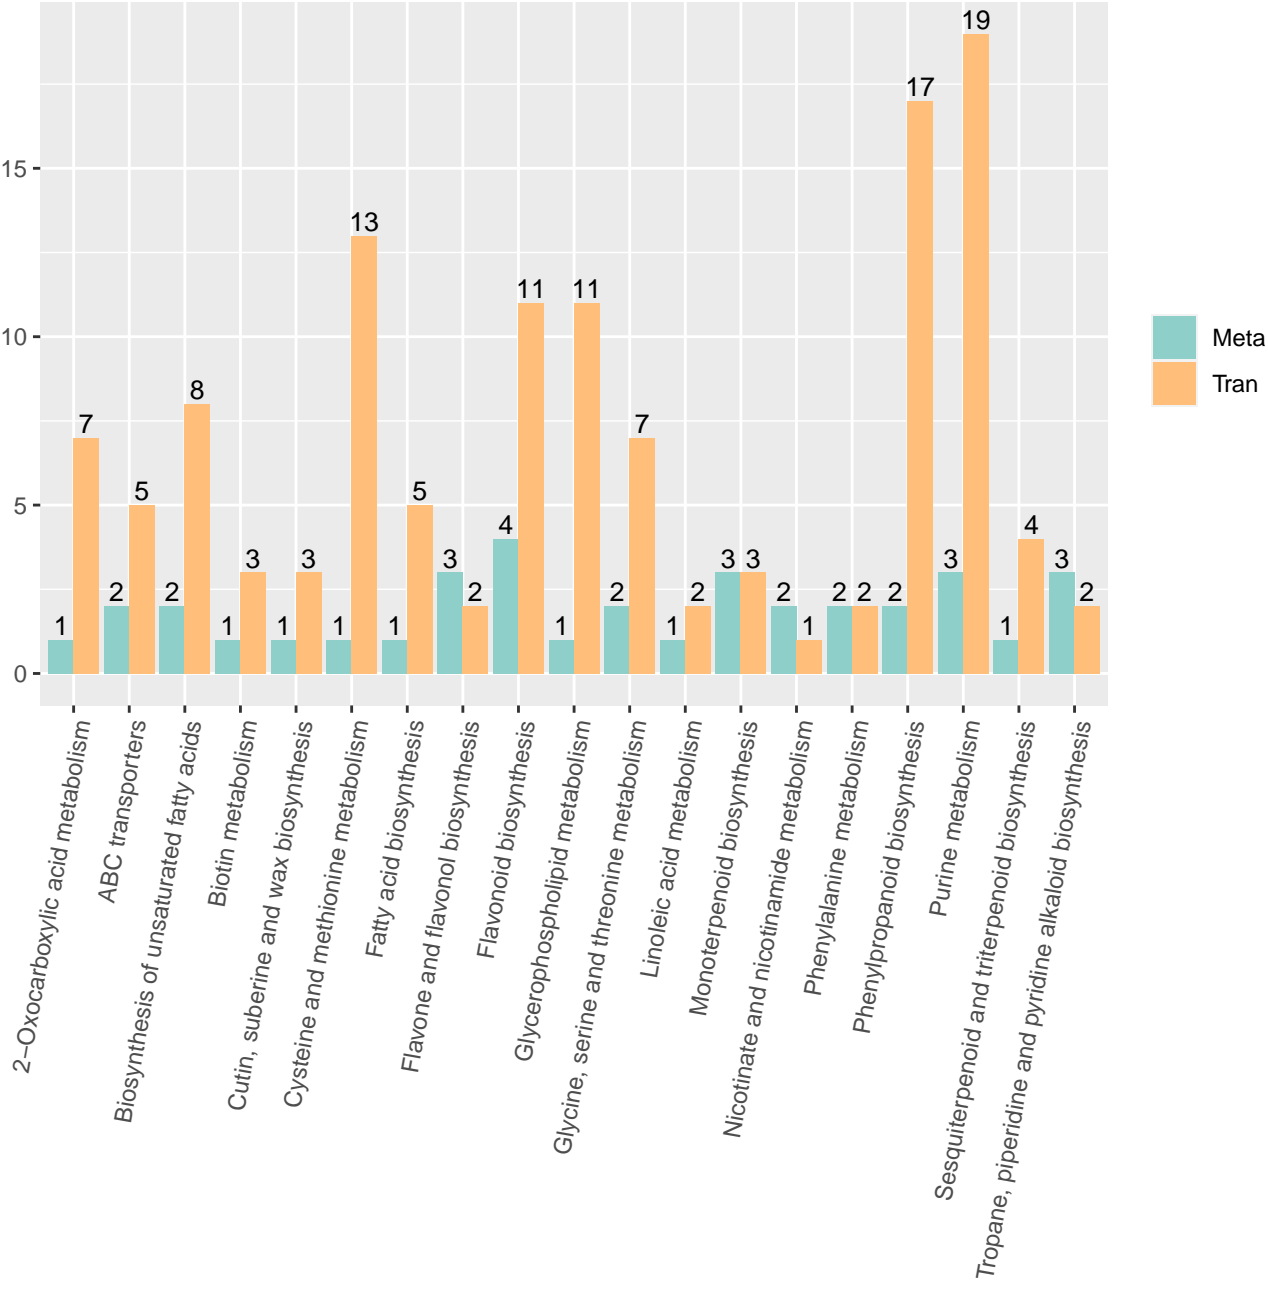

Supplement: s1 [file s1]

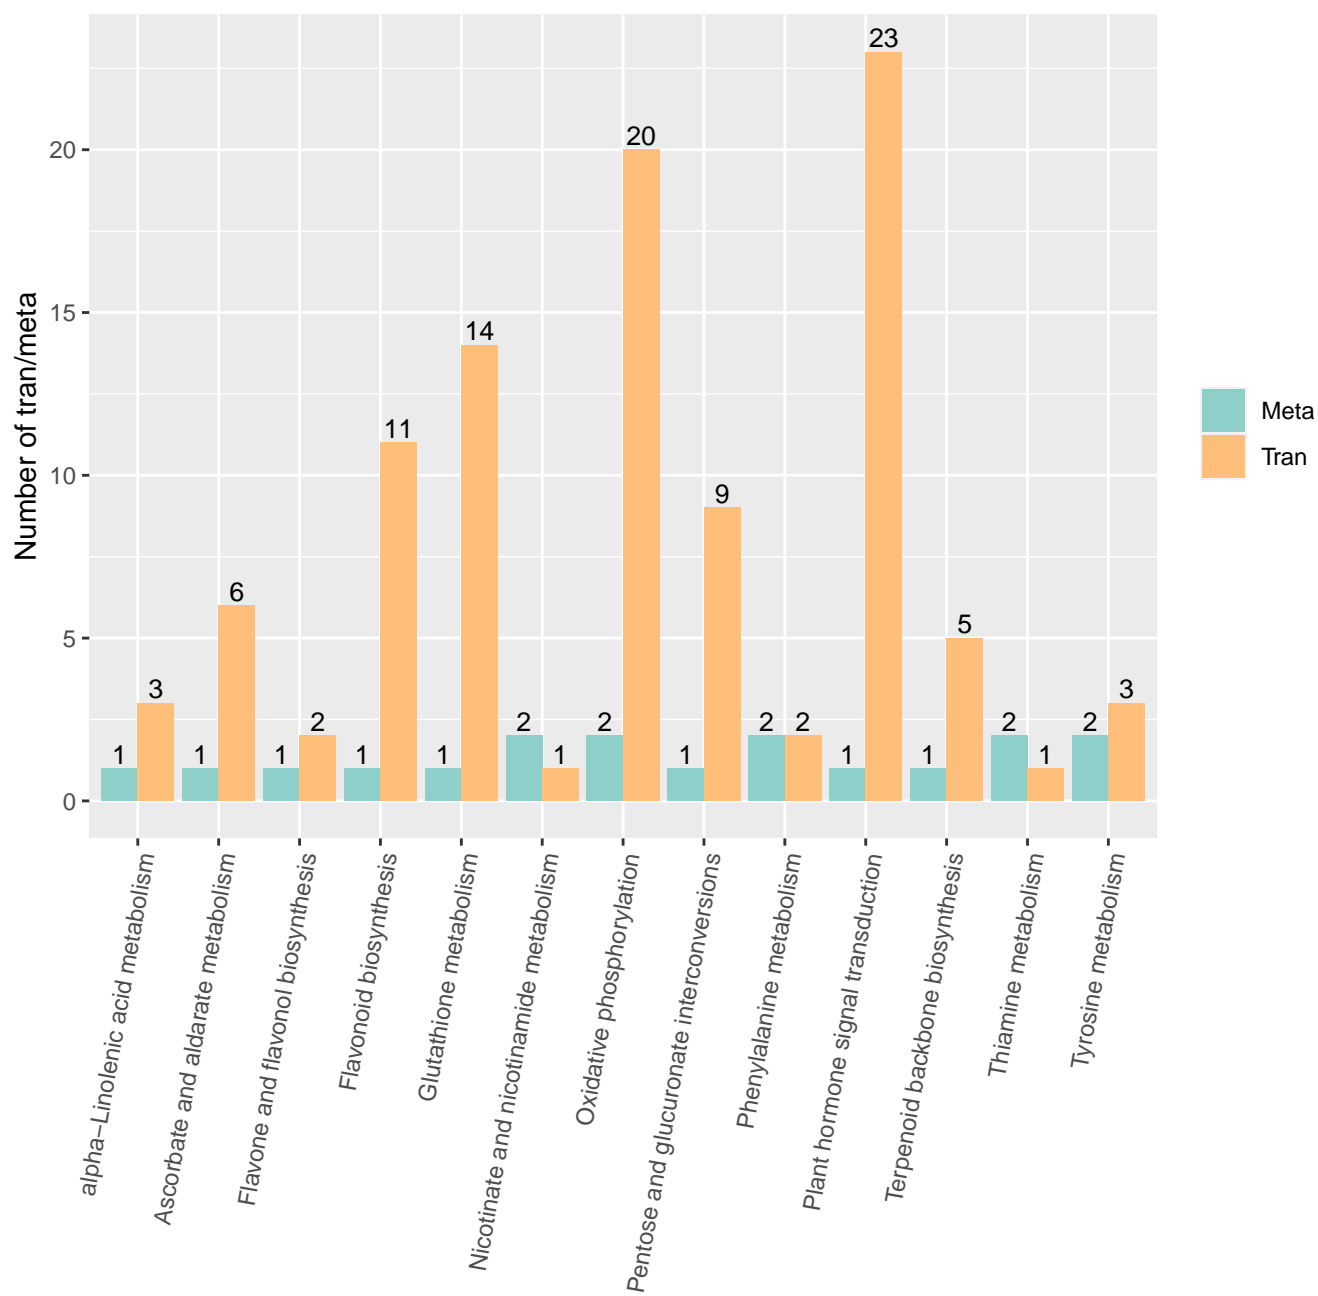

Supplement: s1 [file s1]
